# Supplementary material for: Effects of single and multiple nucleotide mutations on loop-mediated isothermal amplification
Source: Royal Society of Chemistry journal article supplement (doi:10.1039/d3an01927f), 2024-01-01
Supplement: d3an01927f1.xlsx [file d3an01927f1.xlsx]

## Sheet: Table S1
Name	Sequence
RdRP_F3	TATGGTGGTTGGCACAAC
RdRP_B3	CTATTAGCATAAGCAGTTGTGG
RdRP_FIP	TGCGAGCAAGAACAAGTGAGGTGGGTTGGGATTATCCTAAATG
RdRP_BIP-Cy5	/5Cy5/TGTTGTAGCTTGTCACACCGTTCCACACATGACCATTTCACT
RdRP_LF	AGCATGTTAGGCATGGCTCT
RdRP_LB	AGCTAATGAGTGTGCTCAAGT
RdRP_BIPc-11FQ	AAGCTACAACA/3IABkFQ/

## Sheet: Table S2
based on numbering of MN985325
Sample	T7 promoter and start site	nt 15201 to 15283 (inc F3)	nt 15284 to 15305 (F2)	15306 to 15340 (between F2-F1 inc LF)	nt 15341 - 15361 (F1)	nt 15362 - 15540 (inc B2, B1, B3 - 25 bases past end of B3)	Complete Sequence
Control	TAATACGACTCACTATAGGG	agtaattgga acaagcaaat tctatggtgg ttggcacaac atgttaaaaa ctgtttatag tgatgtagaa aaccctcacc tta	tgggttg ggattatcct aaatg	tgata gagccatgcc taacatgctt agaattatgg	cctcacttgt tcttgctcgc a	aacatacaa cgtgttgtag cttgtcacac cgtttctata gattagctaa tgagtgtgct caagtattga gtgaaatggt catgtgtggc ggttcactat atgttaaacc aggtggaacc tcatcaggag atgccacaac tgcttatgct aatagtgttt ttaacatttg tcaagctgtc	TAATACGACTCACTATAGGGagtaattgga acaagcaaat tctatggtgg ttggcacaac atgttaaaaa ctgtttatag tgatgtagaa aaccctcacc ttatgggttg ggattatcct aaatgtgata gagccatgcc taacatgctt agaattatgg cctcacttgt tcttgctcgc aaacatacaa cgtgttgtag cttgtcacac cgtttctata gattagctaa tgagtgtgct caagtattga gtgaaatggt catgtgtggc ggttcactat atgttaaacc aggtggaacc tcatcaggag atgccacaac tgcttatgct aatagtgttt ttaacatttg tcaagctgtc
F2-s1-1	TAATACGACTCACTATAGGG	agtaattgga acaagcaaat tctatggtgg ttggcacaac atgttaaaaa ctgtttatag tgatgtagaa aaccctcacc tta	tgggttg ggattatcct aaatC	tgata gagccatgcc taacatgctt agaattatgg	cctcacttgt tcttgctcgc a	aacatacaa cgtgttgtag cttgtcacac cgtttctata gattagctaa tgagtgtgct caagtattga gtgaaatggt catgtgtggc ggttcactat atgttaaacc aggtggaacc tcatcaggag atgccacaac tgcttatgct aatagtgttt ttaacatttg tcaagctgtc	TAATACGACTCACTATAGGGagtaattgga acaagcaaat tctatggtgg ttggcacaac atgttaaaaa ctgtttatag tgatgtagaa aaccctcacc ttatgggttg ggattatcct aaatCtgata gagccatgcc taacatgctt agaattatgg cctcacttgt tcttgctcgc aaacatacaa cgtgttgtag cttgtcacac cgtttctata gattagctaa tgagtgtgct caagtattga gtgaaatggt catgtgtggc ggttcactat atgttaaacc aggtggaacc tcatcaggag atgccacaac tgcttatgct aatagtgttt ttaacatttg tcaagctgtc
F2-s1-2	TAATACGACTCACTATAGGG	agtaattgga acaagcaaat tctatggtgg ttggcacaac atgttaaaaa ctgtttatag tgatgtagaa aaccctcacc tta	tgggttg ggattatcct aTatg	tgata gagccatgcc taacatgctt agaattatgg	cctcacttgt tcttgctcgc a	aacatacaa cgtgttgtag cttgtcacac cgtttctata gattagctaa tgagtgtgct caagtattga gtgaaatggt catgtgtggc ggttcactat atgttaaacc aggtggaacc tcatcaggag atgccacaac tgcttatgct aatagtgttt ttaacatttg tcaagctgtc	TAATACGACTCACTATAGGGagtaattgga acaagcaaat tctatggtgg ttggcacaac atgttaaaaa ctgtttatag tgatgtagaa aaccctcacc ttatgggttg ggattatcct aTatgtgata gagccatgcc taacatgctt agaattatgg cctcacttgt tcttgctcgc aaacatacaa cgtgttgtag cttgtcacac cgtttctata gattagctaa tgagtgtgct caagtattga gtgaaatggt catgtgtggc ggttcactat atgttaaacc aggtggaacc tcatcaggag atgccacaac tgcttatgct aatagtgttt ttaacatttg tcaagctgtc
F2-s1-3	TAATACGACTCACTATAGGG	agtaattgga acaagcaaat tctatggtgg ttggcacaac atgttaaaaa ctgtttatag tgatgtagaa aaccctcacc tta	tgggttg ggatAatcct aaatg	tgata gagccatgcc taacatgctt agaattatgg	cctcacttgt tcttgctcgc a	aacatacaa cgtgttgtag cttgtcacac cgtttctata gattagctaa tgagtgtgct caagtattga gtgaaatggt catgtgtggc ggttcactat atgttaaacc aggtggaacc tcatcaggag atgccacaac tgcttatgct aatagtgttt ttaacatttg tcaagctgtc	TAATACGACTCACTATAGGGagtaattgga acaagcaaat tctatggtgg ttggcacaac atgttaaaaa ctgtttatag tgatgtagaa aaccctcacc ttatgggttg ggatAatcct aaatgtgata gagccatgcc taacatgctt agaattatgg cctcacttgt tcttgctcgc aaacatacaa cgtgttgtag cttgtcacac cgtttctata gattagctaa tgagtgtgct caagtattga gtgaaatggt catgtgtggc ggttcactat atgttaaacc aggtggaacc tcatcaggag atgccacaac tgcttatgct aatagtgttt ttaacatttg tcaagctgtc
F2-s1-4	TAATACGACTCACTATAGGG	agtaattgga acaagcaaat tctatggtgg ttggcacaac atgttaaaaa ctgtttatag tgatgtagaa aaccctcacc tta	tggCttg ggattatcct aaatg	tgata gagccatgcc taacatgctt agaattatgg	cctcacttgt tcttgctcgc a	aacatacaa cgtgttgtag cttgtcacac cgtttctata gattagctaa tgagtgtgct caagtattga gtgaaatggt catgtgtggc ggttcactat atgttaaacc aggtggaacc tcatcaggag atgccacaac tgcttatgct aatagtgttt ttaacatttg tcaagctgtc	TAATACGACTCACTATAGGGagtaattgga acaagcaaat tctatggtgg ttggcacaac atgttaaaaa ctgtttatag tgatgtagaa aaccctcacc ttatggCttg ggattatcct aaatgtgata gagccatgcc taacatgctt agaattatgg cctcacttgt tcttgctcgc aaacatacaa cgtgttgtag cttgtcacac cgtttctata gattagctaa tgagtgtgct caagtattga gtgaaatggt catgtgtggc ggttcactat atgttaaacc aggtggaacc tcatcaggag atgccacaac tgcttatgct aatagtgttt ttaacatttg tcaagctgtc
F2-s2-5	TAATACGACTCACTATAGGG	agtaattgga acaagcaaat tctatggtgg ttggcacaac atgttaaaaa ctgtttatag tgatgtagaa aaccctcacc tta	tgggttg ggattatcct aTatC	tgata gagccatgcc taacatgctt agaattatgg	cctcacttgt tcttgctcgc a	aacatacaa cgtgttgtag cttgtcacac cgtttctata gattagctaa tgagtgtgct caagtattga gtgaaatggt catgtgtggc ggttcactat atgttaaacc aggtggaacc tcatcaggag atgccacaac tgcttatgct aatagtgttt ttaacatttg tcaagctgtc	TAATACGACTCACTATAGGGagtaattgga acaagcaaat tctatggtgg ttggcacaac atgttaaaaa ctgtttatag tgatgtagaa aaccctcacc ttatgggttg ggattatcct aTatCtgata gagccatgcc taacatgctt agaattatgg cctcacttgt tcttgctcgc aaacatacaa cgtgttgtag cttgtcacac cgtttctata gattagctaa tgagtgtgct caagtattga gtgaaatggt catgtgtggc ggttcactat atgttaaacc aggtggaacc tcatcaggag atgccacaac tgcttatgct aatagtgttt ttaacatttg tcaagctgtc
F2-s2-6	TAATACGACTCACTATAGGG	agtaattgga acaagcaaat tctatggtgg ttggcacaac atgttaaaaa ctgtttatag tgatgtagaa aaccctcacc tta	tgggttg ggatAatcct aTatg	tgata gagccatgcc taacatgctt agaattatgg	cctcacttgt tcttgctcgc a	aacatacaa cgtgttgtag cttgtcacac cgtttctata gattagctaa tgagtgtgct caagtattga gtgaaatggt catgtgtggc ggttcactat atgttaaacc aggtggaacc tcatcaggag atgccacaac tgcttatgct aatagtgttt ttaacatttg tcaagctgtc	TAATACGACTCACTATAGGGagtaattgga acaagcaaat tctatggtgg ttggcacaac atgttaaaaa ctgtttatag tgatgtagaa aaccctcacc ttatgggttg ggatAatcct aTatgtgata gagccatgcc taacatgctt agaattatgg cctcacttgt tcttgctcgc aaacatacaa cgtgttgtag cttgtcacac cgtttctata gattagctaa tgagtgtgct caagtattga gtgaaatggt catgtgtggc ggttcactat atgttaaacc aggtggaacc tcatcaggag atgccacaac tgcttatgct aatagtgttt ttaacatttg tcaagctgtc
F2-s2-7	TAATACGACTCACTATAGGG	agtaattgga acaagcaaat tctatggtgg ttggcacaac atgttaaaaa ctgtttatag tgatgtagaa aaccctcacc tta	tggCttg ggatAatcct aaatg	tgata gagccatgcc taacatgctt agaattatgg	cctcacttgt tcttgctcgc a	aacatacaa cgtgttgtag cttgtcacac cgtttctata gattagctaa tgagtgtgct caagtattga gtgaaatggt catgtgtggc ggttcactat atgttaaacc aggtggaacc tcatcaggag atgccacaac tgcttatgct aatagtgttt ttaacatttg tcaagctgtc	TAATACGACTCACTATAGGGagtaattgga acaagcaaat tctatggtgg ttggcacaac atgttaaaaa ctgtttatag tgatgtagaa aaccctcacc ttatggCttg ggatAatcct aaatgtgata gagccatgcc taacatgctt agaattatgg cctcacttgt tcttgctcgc aaacatacaa cgtgttgtag cttgtcacac cgtttctata gattagctaa tgagtgtgct caagtattga gtgaaatggt catgtgtggc ggttcactat atgttaaacc aggtggaacc tcatcaggag atgccacaac tgcttatgct aatagtgttt ttaacatttg tcaagctgtc
F2-s2-8	TAATACGACTCACTATAGGG	agtaattgga acaagcaaat tctatggtgg ttggcacaac atgttaaaaa ctgtttatag tgatgtagaa aaccctcacc tta	tgggttg ggattatcct TTatg	tgata gagccatgcc taacatgctt agaattatgg	cctcacttgt tcttgctcgc a	aacatacaa cgtgttgtag cttgtcacac cgtttctata gattagctaa tgagtgtgct caagtattga gtgaaatggt catgtgtggc ggttcactat atgttaaacc aggtggaacc tcatcaggag atgccacaac tgcttatgct aatagtgttt ttaacatttg tcaagctgtc	TAATACGACTCACTATAGGGagtaattgga acaagcaaat tctatggtgg ttggcacaac atgttaaaaa ctgtttatag tgatgtagaa aaccctcacc ttatgggttg ggattatcct TTatgtgata gagccatgcc taacatgctt agaattatgg cctcacttgt tcttgctcgc aaacatacaa cgtgttgtag cttgtcacac cgtttctata gattagctaa tgagtgtgct caagtattga gtgaaatggt catgtgtggc ggttcactat atgttaaacc aggtggaacc tcatcaggag atgccacaac tgcttatgct aatagtgttt ttaacatttg tcaagctgtc
F2-s2-9	TAATACGACTCACTATAGGG	agtaattgga acaagcaaat tctatggtgg ttggcacaac atgttaaaaa ctgtttatag tgatgtagaa aaccctcacc tta	tgggttg ggaAAatcct aaatg	tgata gagccatgcc taacatgctt agaattatgg	cctcacttgt tcttgctcgc a	aacatacaa cgtgttgtag cttgtcacac cgtttctata gattagctaa tgagtgtgct caagtattga gtgaaatggt catgtgtggc ggttcactat atgttaaacc aggtggaacc tcatcaggag atgccacaac tgcttatgct aatagtgttt ttaacatttg tcaagctgtc	TAATACGACTCACTATAGGGagtaattgga acaagcaaat tctatggtgg ttggcacaac atgttaaaaa ctgtttatag tgatgtagaa aaccctcacc ttatgggttg ggaAAatcct aaatgtgata gagccatgcc taacatgctt agaattatgg cctcacttgt tcttgctcgc aaacatacaa cgtgttgtag cttgtcacac cgtttctata gattagctaa tgagtgtgct caagtattga gtgaaatggt catgtgtggc ggttcactat atgttaaacc aggtggaacc tcatcaggag atgccacaac tgcttatgct aatagtgttt ttaacatttg tcaagctgtc
F2-s2-10	TAATACGACTCACTATAGGG	agtaattgga acaagcaaat tctatggtgg ttggcacaac atgttaaaaa ctgtttatag tgatgtagaa aaccctcacc tta	tgCCttg ggattatcct aaatg	tgata gagccatgcc taacatgctt agaattatgg	cctcacttgt tcttgctcgc a	aacatacaa cgtgttgtag cttgtcacac cgtttctata gattagctaa tgagtgtgct caagtattga gtgaaatggt catgtgtggc ggttcactat atgttaaacc aggtggaacc tcatcaggag atgccacaac tgcttatgct aatagtgttt ttaacatttg tcaagctgtc	TAATACGACTCACTATAGGGagtaattgga acaagcaaat tctatggtgg ttggcacaac atgttaaaaa ctgtttatag tgatgtagaa aaccctcacc ttatgCCttg ggattatcct aaatgtgata gagccatgcc taacatgctt agaattatgg cctcacttgt tcttgctcgc aaacatacaa cgtgttgtag cttgtcacac cgtttctata gattagctaa tgagtgtgct caagtattga gtgaaatggt catgtgtggc ggttcactat atgttaaacc aggtggaacc tcatcaggag atgccacaac tgcttatgct aatagtgttt ttaacatttg tcaagctgtc
F2-s3-11	TAATACGACTCACTATAGGG	agtaattgga acaagcaaat tctatggtgg ttggcacaac atgttaaaaa ctgtttatag tgatgtagaa aaccctcacc tta	tggCttg ggatAatcct aTatg	tgata gagccatgcc taacatgctt agaattatgg	cctcacttgt tcttgctcgc a	aacatacaa cgtgttgtag cttgtcacac cgtttctata gattagctaa tgagtgtgct caagtattga gtgaaatggt catgtgtggc ggttcactat atgttaaacc aggtggaacc tcatcaggag atgccacaac tgcttatgct aatagtgttt ttaacatttg tcaagctgtc	TAATACGACTCACTATAGGGagtaattgga acaagcaaat tctatggtgg ttggcacaac atgttaaaaa ctgtttatag tgatgtagaa aaccctcacc ttatggCttg ggatAatcct aTatgtgata gagccatgcc taacatgctt agaattatgg cctcacttgt tcttgctcgc aaacatacaa cgtgttgtag cttgtcacac cgtttctata gattagctaa tgagtgtgct caagtattga gtgaaatggt catgtgtggc ggttcactat atgttaaacc aggtggaacc tcatcaggag atgccacaac tgcttatgct aatagtgttt ttaacatttg tcaagctgtc
F1-s1-12	TAATACGACTCACTATAGGG	agtaattgga acaagcaaat tctatggtgg ttggcacaac atgttaaaaa ctgtttatag tgatgtagaa aaccctcacc tta	tgggttg ggattatcct aaatg	tgata gagccatgcc taacatgctt agaattatgg	cctcacttgt tcttgctcgc T	aacatacaa cgtgttgtag cttgtcacac cgtttctata gattagctaa tgagtgtgct caagtattga gtgaaatggt catgtgtggc ggttcactat atgttaaacc aggtggaacc tcatcaggag atgccacaac tgcttatgct aatagtgttt ttaacatttg tcaagctgtc	TAATACGACTCACTATAGGGagtaattgga acaagcaaat tctatggtgg ttggcacaac atgttaaaaa ctgtttatag tgatgtagaa aaccctcacc ttatgggttg ggattatcct aaatgtgata gagccatgcc taacatgctt agaattatgg cctcacttgt tcttgctcgc Taacatacaa cgtgttgtag cttgtcacac cgtttctata gattagctaa tgagtgtgct caagtattga gtgaaatggt catgtgtggc ggttcactat atgttaaacc aggtggaacc tcatcaggag atgccacaac tgcttatgct aatagtgttt ttaacatttg tcaagctgtc
F1-s1-13	TAATACGACTCACTATAGGG	agtaattgga acaagcaaat tctatggtgg ttggcacaac atgttaaaaa ctgtttatag tgatgtagaa aaccctcacc tta	tgggttg ggattatcct aaatg	tgata gagccatgcc taacatgctt agaattatgg	cctGacttgt tcttgctcgc a	aacatacaa cgtgttgtag cttgtcacac cgtttctata gattagctaa tgagtgtgct caagtattga gtgaaatggt catgtgtggc ggttcactat atgttaaacc aggtggaacc tcatcaggag atgccacaac tgcttatgct aatagtgttt ttaacatttg tcaagctgtc	TAATACGACTCACTATAGGGagtaattgga acaagcaaat tctatggtgg ttggcacaac atgttaaaaa ctgtttatag tgatgtagaa aaccctcacc ttatgggttg ggattatcct aaatgtgata gagccatgcc taacatgctt agaattatgg cctGacttgt tcttgctcgc aaacatacaa cgtgttgtag cttgtcacac cgtttctata gattagctaa tgagtgtgct caagtattga gtgaaatggt catgtgtggc ggttcactat atgttaaacc aggtggaacc tcatcaggag atgccacaac tgcttatgct aatagtgttt ttaacatttg tcaagctgtc
F1-s1-14	TAATACGACTCACTATAGGG	agtaattgga acaagcaaat tctatggtgg ttggcacaac atgttaaaaa ctgtttatag tgatgtagaa aaccctcacc tta	tgggttg ggattatcct aaatg	tgata gagccatgcc taacatgctt agaattatgg	cctcacttgt Acttgctcgc a	aacatacaa cgtgttgtag cttgtcacac cgtttctata gattagctaa tgagtgtgct caagtattga gtgaaatggt catgtgtggc ggttcactat atgttaaacc aggtggaacc tcatcaggag atgccacaac tgcttatgct aatagtgttt ttaacatttg tcaagctgtc	TAATACGACTCACTATAGGGagtaattgga acaagcaaat tctatggtgg ttggcacaac atgttaaaaa ctgtttatag tgatgtagaa aaccctcacc ttatgggttg ggattatcct aaatgtgata gagccatgcc taacatgctt agaattatgg cctcacttgt Acttgctcgc aaacatacaa cgtgttgtag cttgtcacac cgtttctata gattagctaa tgagtgtgct caagtattga gtgaaatggt catgtgtggc ggttcactat atgttaaacc aggtggaacc tcatcaggag atgccacaac tgcttatgct aatagtgttt ttaacatttg tcaagctgtc
F1-s1-15	TAATACGACTCACTATAGGG	agtaattgga acaagcaaat tctatggtgg ttggcacaac atgttaaaaa ctgtttatag tgatgtagaa aaccctcacc tta	tgggttg ggattatcct aaatg	tgata gagccatgcc taacatgctt agaattatgg	cctcacttgt tcttgctGgc a	aacatacaa cgtgttgtag cttgtcacac cgtttctata gattagctaa tgagtgtgct caagtattga gtgaaatggt catgtgtggc ggttcactat atgttaaacc aggtggaacc tcatcaggag atgccacaac tgcttatgct aatagtgttt ttaacatttg tcaagctgtc	TAATACGACTCACTATAGGGagtaattgga acaagcaaat tctatggtgg ttggcacaac atgttaaaaa ctgtttatag tgatgtagaa aaccctcacc ttatgggttg ggattatcct aaatgtgata gagccatgcc taacatgctt agaattatgg cctcacttgt tcttgctGgc aaacatacaa cgtgttgtag cttgtcacac cgtttctata gattagctaa tgagtgtgct caagtattga gtgaaatggt catgtgtggc ggttcactat atgttaaacc aggtggaacc tcatcaggag atgccacaac tgcttatgct aatagtgttt ttaacatttg tcaagctgtc
F1-s2-16	TAATACGACTCACTATAGGG	agtaattgga acaagcaaat tctatggtgg ttggcacaac atgttaaaaa ctgtttatag tgatgtagaa aaccctcacc tta	tgggttg ggattatcct aaatg	tgata gagccatgcc taacatgctt agaattatgg	cctcacttgt tcttgctGgc T	aacatacaa cgtgttgtag cttgtcacac cgtttctata gattagctaa tgagtgtgct caagtattga gtgaaatggt catgtgtggc ggttcactat atgttaaacc aggtggaacc tcatcaggag atgccacaac tgcttatgct aatagtgttt ttaacatttg tcaagctgtc	TAATACGACTCACTATAGGGagtaattgga acaagcaaat tctatggtgg ttggcacaac atgttaaaaa ctgtttatag tgatgtagaa aaccctcacc ttatgggttg ggattatcct aaatgtgata gagccatgcc taacatgctt agaattatgg cctcacttgt tcttgctGgc Taacatacaa cgtgttgtag cttgtcacac cgtttctata gattagctaa tgagtgtgct caagtattga gtgaaatggt catgtgtggc ggttcactat atgttaaacc aggtggaacc tcatcaggag atgccacaac tgcttatgct aatagtgttt ttaacatttg tcaagctgtc
F1-s2-17	TAATACGACTCACTATAGGG	agtaattgga acaagcaaat tctatggtgg ttggcacaac atgttaaaaa ctgtttatag tgatgtagaa aaccctcacc tta	tgggttg ggattatcct aaatg	tgata gagccatgcc taacatgctt agaattatgg	cctGacttgt Acttgctcgc a	aacatacaa cgtgttgtag cttgtcacac cgtttctata gattagctaa tgagtgtgct caagtattga gtgaaatggt catgtgtggc ggttcactat atgttaaacc aggtggaacc tcatcaggag atgccacaac tgcttatgct aatagtgttt ttaacatttg tcaagctgtc	TAATACGACTCACTATAGGGagtaattgga acaagcaaat tctatggtgg ttggcacaac atgttaaaaa ctgtttatag tgatgtagaa aaccctcacc ttatgggttg ggattatcct aaatgtgata gagccatgcc taacatgctt agaattatgg cctGacttgt Acttgctcgc aaacatacaa cgtgttgtag cttgtcacac cgtttctata gattagctaa tgagtgtgct caagtattga gtgaaatggt catgtgtggc ggttcactat atgttaaacc aggtggaacc tcatcaggag atgccacaac tgcttatgct aatagtgttt ttaacatttg tcaagctgtc
F1-s2-18	TAATACGACTCACTATAGGG	agtaattgga acaagcaaat tctatggtgg ttggcacaac atgttaaaaa ctgtttatag tgatgtagaa aaccctcacc tta	tgggttg ggattatcct aaatg	tgata gagccatgcc taacatgctt agaattatgg	cctcacttgt ActtgctGgc a	aacatacaa cgtgttgtag cttgtcacac cgtttctata gattagctaa tgagtgtgct caagtattga gtgaaatggt catgtgtggc ggttcactat atgttaaacc aggtggaacc tcatcaggag atgccacaac tgcttatgct aatagtgttt ttaacatttg tcaagctgtc	TAATACGACTCACTATAGGGagtaattgga acaagcaaat tctatggtgg ttggcacaac atgttaaaaa ctgtttatag tgatgtagaa aaccctcacc ttatgggttg ggattatcct aaatgtgata gagccatgcc taacatgctt agaattatgg cctcacttgt ActtgctGgc aaacatacaa cgtgttgtag cttgtcacac cgtttctata gattagctaa tgagtgtgct caagtattga gtgaaatggt catgtgtggc ggttcactat atgttaaacc aggtggaacc tcatcaggag atgccacaac tgcttatgct aatagtgttt ttaacatttg tcaagctgtc
F1-s2-19	TAATACGACTCACTATAGGG	agtaattgga acaagcaaat tctatggtgg ttggcacaac atgttaaaaa ctgtttatag tgatgtagaa aaccctcacc tta	tgggttg ggattatcct aaatg	tgata gagccatgcc taacatgctt agaattatgg	ccAGacttgt tcttgctcgc a	aacatacaa cgtgttgtag cttgtcacac cgtttctata gattagctaa tgagtgtgct caagtattga gtgaaatggt catgtgtggc ggttcactat atgttaaacc aggtggaacc tcatcaggag atgccacaac tgcttatgct aatagtgttt ttaacatttg tcaagctgtc	TAATACGACTCACTATAGGGagtaattgga acaagcaaat tctatggtgg ttggcacaac atgttaaaaa ctgtttatag tgatgtagaa aaccctcacc ttatgggttg ggattatcct aaatgtgata gagccatgcc taacatgctt agaattatgg ccAGacttgt tcttgctcgc aaacatacaa cgtgttgtag cttgtcacac cgtttctata gattagctaa tgagtgtgct caagtattga gtgaaatggt catgtgtggc ggttcactat atgttaaacc aggtggaacc tcatcaggag atgccacaac tgcttatgct aatagtgttt ttaacatttg tcaagctgtc
F1-s2-20	TAATACGACTCACTATAGGG	agtaattgga acaagcaaat tctatggtgg ttggcacaac atgttaaaaa ctgtttatag tgatgtagaa aaccctcacc tta	tgggttg ggattatcct aaatg	tgata gagccatgcc taacatgctt agaattatgg	cctcacttgA Acttgctcgc a	aacatacaa cgtgttgtag cttgtcacac cgtttctata gattagctaa tgagtgtgct caagtattga gtgaaatggt catgtgtggc ggttcactat atgttaaacc aggtggaacc tcatcaggag atgccacaac tgcttatgct aatagtgttt ttaacatttg tcaagctgtc	TAATACGACTCACTATAGGGagtaattgga acaagcaaat tctatggtgg ttggcacaac atgttaaaaa ctgtttatag tgatgtagaa aaccctcacc ttatgggttg ggattatcct aaatgtgata gagccatgcc taacatgctt agaattatgg cctcacttgA Acttgctcgc aaacatacaa cgtgttgtag cttgtcacac cgtttctata gattagctaa tgagtgtgct caagtattga gtgaaatggt catgtgtggc ggttcactat atgttaaacc aggtggaacc tcatcaggag atgccacaac tgcttatgct aatagtgttt ttaacatttg tcaagctgtc
F1-s2-21	TAATACGACTCACTATAGGG	agtaattgga acaagcaaat tctatggtgg ttggcacaac atgttaaaaa ctgtttatag tgatgtagaa aaccctcacc tta	tgggttg ggattatcct aaatg	tgata gagccatgcc taacatgctt agaattatgg	cctcacttgt tcttgcAGgc a	aacatacaa cgtgttgtag cttgtcacac cgtttctata gattagctaa tgagtgtgct caagtattga gtgaaatggt catgtgtggc ggttcactat atgttaaacc aggtggaacc tcatcaggag atgccacaac tgcttatgct aatagtgttt ttaacatttg tcaagctgtc	TAATACGACTCACTATAGGGagtaattgga acaagcaaat tctatggtgg ttggcacaac atgttaaaaa ctgtttatag tgatgtagaa aaccctcacc ttatgggttg ggattatcct aaatgtgata gagccatgcc taacatgctt agaattatgg cctcacttgt tcttgcAGgc aaacatacaa cgtgttgtag cttgtcacac cgtttctata gattagctaa tgagtgtgct caagtattga gtgaaatggt catgtgtggc ggttcactat atgttaaacc aggtggaacc tcatcaggag atgccacaac tgcttatgct aatagtgttt ttaacatttg tcaagctgtc
F1-s3-22	TAATACGACTCACTATAGGG	agtaattgga acaagcaaat tctatggtgg ttggcacaac atgttaaaaa ctgtttatag tgatgtagaa aaccctcacc tta	tgggttg ggattatcct aaatg	tgata gagccatgcc taacatgctt agaattatgg	cctGacttgt ActtgctGgc a	aacatacaa cgtgttgtag cttgtcacac cgtttctata gattagctaa tgagtgtgct caagtattga gtgaaatggt catgtgtggc ggttcactat atgttaaacc aggtggaacc tcatcaggag atgccacaac tgcttatgct aatagtgttt ttaacatttg tcaagctgtc	TAATACGACTCACTATAGGGagtaattgga acaagcaaat tctatggtgg ttggcacaac atgttaaaaa ctgtttatag tgatgtagaa aaccctcacc ttatgggttg ggattatcct aaatgtgata gagccatgcc taacatgctt agaattatgg cctGacttgt ActtgctGgc aaacatacaa cgtgttgtag cttgtcacac cgtttctata gattagctaa tgagtgtgct caagtattga gtgaaatggt catgtgtggc ggttcactat atgttaaacc aggtggaacc tcatcaggag atgccacaac tgcttatgct aatagtgttt ttaacatttg tcaagctgtc
F1-F2-s3-23	TAATACGACTCACTATAGGG	agtaattgga acaagcaaat tctatggtgg ttggcacaac atgttaaaaa ctgtttatag tgatgtagaa aaccctcacc tta	tgggttg ggattatcct aTatg	tgata gagccatgcc taacatgctt agaattatgg	cctGacttgt Acttgctcgc a	aacatacaa cgtgttgtag cttgtcacac cgtttctata gattagctaa tgagtgtgct caagtattga gtgaaatggt catgtgtggc ggttcactat atgttaaacc aggtggaacc tcatcaggag atgccacaac tgcttatgct aatagtgttt ttaacatttg tcaagctgtc	TAATACGACTCACTATAGGGagtaattgga acaagcaaat tctatggtgg ttggcacaac atgttaaaaa ctgtttatag tgatgtagaa aaccctcacc ttatgggttg ggattatcct aTatgtgata gagccatgcc taacatgctt agaattatgg cctGacttgt Acttgctcgc aaacatacaa cgtgttgtag cttgtcacac cgtttctata gattagctaa tgagtgtgct caagtattga gtgaaatggt catgtgtggc ggttcactat atgttaaacc aggtggaacc tcatcaggag atgccacaac tgcttatgct aatagtgttt ttaacatttg tcaagctgtc
F1-F2-s3-24	TAATACGACTCACTATAGGG	agtaattgga acaagcaaat tctatggtgg ttggcacaac atgttaaaaa ctgtttatag tgatgtagaa aaccctcacc tta	tggCttg ggatAatcct aaatg	tgata gagccatgcc taacatgctt agaattatgg	cctcacttgt Acttgctcgc a	aacatacaa cgtgttgtag cttgtcacac cgtttctata gattagctaa tgagtgtgct caagtattga gtgaaatggt catgtgtggc ggttcactat atgttaaacc aggtggaacc tcatcaggag atgccacaac tgcttatgct aatagtgttt ttaacatttg tcaagctgtc	TAATACGACTCACTATAGGGagtaattgga acaagcaaat tctatggtgg ttggcacaac atgttaaaaa ctgtttatag tgatgtagaa aaccctcacc ttatggCttg ggatAatcct aaatgtgata gagccatgcc taacatgctt agaattatgg cctcacttgt Acttgctcgc aaacatacaa cgtgttgtag cttgtcacac cgtttctata gattagctaa tgagtgtgct caagtattga gtgaaatggt catgtgtggc ggttcactat atgttaaacc aggtggaacc tcatcaggag atgccacaac tgcttatgct aatagtgttt ttaacatttg tcaagctgtc
F1-F2-s4-25	TAATACGACTCACTATAGGG	agtaattgga acaagcaaat tctatggtgg ttggcacaac atgttaaaaa ctgtttatag tgatgtagaa aaccctcacc tta	tgggttg ggatAatcct aTatg	tgata gagccatgcc taacatgctt agaattatgg	cctGacttgt Acttgctcgc a	aacatacaa cgtgttgtag cttgtcacac cgtttctata gattagctaa tgagtgtgct caagtattga gtgaaatggt catgtgtggc ggttcactat atgttaaacc aggtggaacc tcatcaggag atgccacaac tgcttatgct aatagtgttt ttaacatttg tcaagctgtc	TAATACGACTCACTATAGGGagtaattgga acaagcaaat tctatggtgg ttggcacaac atgttaaaaa ctgtttatag tgatgtagaa aaccctcacc ttatgggttg ggatAatcct aTatgtgata gagccatgcc taacatgctt agaattatgg cctGacttgt Acttgctcgc aaacatacaa cgtgttgtag cttgtcacac cgtttctata gattagctaa tgagtgtgct caagtattga gtgaaatggt catgtgtggc ggttcactat atgttaaacc aggtggaacc tcatcaggag atgccacaac tgcttatgct aatagtgttt ttaacatttg tcaagctgtc
F1-F2-s4-26	TAATACGACTCACTATAGGG	agtaattgga acaagcaaat tctatggtgg ttggcacaac atgttaaaaa ctgtttatag tgatgtagaa aaccctcacc tta	tggCttg ggatAatcct aaatg	tgata gagccatgcc taacatgctt agaattatgg	cctcacttgt tcttgcAGgc a	aacatacaa cgtgttgtag cttgtcacac cgtttctata gattagctaa tgagtgtgct caagtattga gtgaaatggt catgtgtggc ggttcactat atgttaaacc aggtggaacc tcatcaggag atgccacaac tgcttatgct aatagtgttt ttaacatttg tcaagctgtc	TAATACGACTCACTATAGGGagtaattgga acaagcaaat tctatggtgg ttggcacaac atgttaaaaa ctgtttatag tgatgtagaa aaccctcacc ttatggCttg ggatAatcct aaatgtgata gagccatgcc taacatgctt agaattatgg cctcacttgt tcttgcAGgc aaacatacaa cgtgttgtag cttgtcacac cgtttctata gattagctaa tgagtgtgct caagtattga gtgaaatggt catgtgtggc ggttcactat atgttaaacc aggtggaacc tcatcaggag atgccacaac tgcttatgct aatagtgttt ttaacatttg tcaagctgtc
BTWN-s2-27	TAATACGACTCACTATAGGG	agtaattgga acaagcaaat tctatggtgg ttggcacaac atgttaaaaa ctgtttatag tgatgtagaa aaccctcacc tta	tgggttg ggattatcct aaatg	tCTta gagccatgcc taacatgctt agaattatgg	cctcacttgt tcttgctcgc a	aacatacaa cgtgttgtag cttgtcacac cgtttctata gattagctaa tgagtgtgct caagtattga gtgaaatggt catgtgtggc ggttcactat atgttaaacc aggtggaacc tcatcaggag atgccacaac tgcttatgct aatagtgttt ttaacatttg tcaagctgtc	TAATACGACTCACTATAGGGagtaattgga acaagcaaat tctatggtgg ttggcacaac atgttaaaaa ctgtttatag tgatgtagaa aaccctcacc ttatgggttg ggattatcct aaatgtCTta gagccatgcc taacatgctt agaattatgg cctcacttgt tcttgctcgc aaacatacaa cgtgttgtag cttgtcacac cgtttctata gattagctaa tgagtgtgct caagtattga gtgaaatggt catgtgtggc ggttcactat atgttaaacc aggtggaacc tcatcaggag atgccacaac tgcttatgct aatagtgttt ttaacatttg tcaagctgtc
BTWN-s3-28	TAATACGACTCACTATAGGG	agtaattgga acaagcaaat tctatggtgg ttggcacaac atgttaaaaa ctgtttatag tgatgtagaa aaccctcacc tta	tgggttg ggattatcct aaatg	tgata gagccatgcc taacatgctt agaTAAatgg	cctcacttgt tcttgctcgc a	aacatacaa cgtgttgtag cttgtcacac cgtttctata gattagctaa tgagtgtgct caagtattga gtgaaatggt catgtgtggc ggttcactat atgttaaacc aggtggaacc tcatcaggag atgccacaac tgcttatgct aatagtgttt ttaacatttg tcaagctgtc	TAATACGACTCACTATAGGGagtaattgga acaagcaaat tctatggtgg ttggcacaac atgttaaaaa ctgtttatag tgatgtagaa aaccctcacc ttatgggttg ggattatcct aaatgtgata gagccatgcc taacatgctt agaTAAatgg cctcacttgt tcttgctcgc aaacatacaa cgtgttgtag cttgtcacac cgtttctata gattagctaa tgagtgtgct caagtattga gtgaaatggt catgtgtggc ggttcactat atgttaaacc aggtggaacc tcatcaggag atgccacaac tgcttatgct aatagtgttt ttaacatttg tcaagctgtc
BTWN-s4-29	TAATACGACTCACTATAGGG	agtaattgga acaagcaaat tctatggtgg ttggcacaac atgttaaaaa ctgtttatag tgatgtagaa aaccctcacc tta	tgggttg ggattatcct aaatg	tgata gagccatgcc taacatgctt agaattatgg	cctcacttgt tcttgctcgc a	aacatacaa cgtgttgtag cttgtcacac cgtttctTtT gattagctaa tgagtgtgct caagtattga gtgaaatggt catgtgtggc ggttcactTt atgttTaacc aggtggaacc tcatcaggag atgccacaac tgcttatgct aatagtgttt ttaacatttg tcaagctgtc	TAATACGACTCACTATAGGGagtaattgga acaagcaaat tctatggtgg ttggcacaac atgttaaaaa ctgtttatag tgatgtagaa aaccctcacc ttatgggttg ggattatcct aaatgtgata gagccatgcc taacatgctt agaattatgg cctcacttgt tcttgctcgc aaacatacaa cgtgttgtag cttgtcacac cgtttctTtT gattagctaa tgagtgtgct caagtattga gtgaaatggt catgtgtggc ggttcactTt atgttTaacc aggtggaacc tcatcaggag atgccacaac tgcttatgct aatagtgttt ttaacatttg tcaagctgtc
F2-d3-30	TAATACGACTCACTATAGGG	agtaattgga acaagcaaat tctatggtgg ttggcacaac atgttaaaaa ctgtttatag tgatgtagaa aaccctcacc tta	gttg ggattatcct aaatg	tgata gagccatgcc taacatgctt agaattatgg	cctcacttgt tcttgctcgc a	aacatacaa cgtgttgtag cttgtcacac cgtttctata gattagctaa tgagtgtgct caagtattga gtgaaatggt catgtgtggc ggttcactat atgttaaacc aggtggaacc tcatcaggag atgccacaac tgcttatgct aatagtgttt ttaacatttg tcaagctgtc	TAATACGACTCACTATAGGGagtaattgga acaagcaaat tctatggtgg ttggcacaac atgttaaaaa ctgtttatag tgatgtagaa aaccctcacc ttagttg ggattatcct aaatgtgata gagccatgcc taacatgctt agaattatgg cctcacttgt tcttgctcgc aaacatacaa cgtgttgtag cttgtcacac cgtttctata gattagctaa tgagtgtgct caagtattga gtgaaatggt catgtgtggc ggttcactat atgttaaacc aggtggaacc tcatcaggag atgccacaac tgcttatgct aatagtgttt ttaacatttg tcaagctgtc
F1-d3-31	TAATACGACTCACTATAGGG	agtaattgga acaagcaaat tctatggtgg ttggcacaac atgttaaaaa ctgtttatag tgatgtagaa aaccctcacc tta	tgggttg ggattatcct aaatg	tgata gagccatgcc taacatgctt agaattatgg	cctcacttgt tgctcgc a	aacatacaa cgtgttgtag cttgtcacac cgtttctata gattagctaa tgagtgtgct caagtattga gtgaaatggt catgtgtggc ggttcactat atgttaaacc aggtggaacc tcatcaggag atgccacaac tgcttatgct aatagtgttt ttaacatttg tcaagctgtc	TAATACGACTCACTATAGGGagtaattgga acaagcaaat tctatggtgg ttggcacaac atgttaaaaa ctgtttatag tgatgtagaa aaccctcacc ttatgggttg ggattatcct aaatgtgata gagccatgcc taacatgctt agaattatgg cctcacttgt tgctcgc aaacatacaa cgtgttgtag cttgtcacac cgtttctata gattagctaa tgagtgtgct caagtattga gtgaaatggt catgtgtggc ggttcactat atgttaaacc aggtggaacc tcatcaggag atgccacaac tgcttatgct aatagtgttt ttaacatttg tcaagctgtc
F2-s1-32	TAATACGACTCACTATAGGG	agtaattgga acaagcaaat tctatggtgg ttggcacaac atgttaaaaa ctgtttatag tgatgtagaa aaccctcacc tta	tgggttg ggattatcct aaaAg	tgata gagccatgcc taacatgctt agaattatgg	cctcacttgt tcttgctcgc a	aacatacaa cgtgttgtag cttgtcacac cgtttctata gattagctaa tgagtgtgct caagtattga gtgaaatggt catgtgtggc ggttcactat atgttaaacc aggtggaacc tcatcaggag atgccacaac tgcttatgct aatagtgttt ttaacatttg tcaagctgtc	TAATACGACTCACTATAGGGagtaattgga acaagcaaat tctatggtgg ttggcacaac atgttaaaaa ctgtttatag tgatgtagaa aaccctcacc ttatgggttg ggattatcct aaaAgtgata gagccatgcc taacatgctt agaattatgg cctcacttgt tcttgctcgc aaacatacaa cgtgttgtag cttgtcacac cgtttctata gattagctaa tgagtgtgct caagtattga gtgaaatggt catgtgtggc ggttcactat atgttaaacc aggtggaacc tcatcaggag atgccacaac tgcttatgct aatagtgttt ttaacatttg tcaagctgtc
F2-s1-33	TAATACGACTCACTATAGGG	agtaattgga acaagcaaat tctatggtgg ttggcacaac atgttaaaaa ctgtttatag tgatgtagaa aaccctcacc tta	tgggttg ggattatcct aaaCg	tgata gagccatgcc taacatgctt agaattatgg	cctcacttgt tcttgctcgc a	aacatacaa cgtgttgtag cttgtcacac cgtttctata gattagctaa tgagtgtgct caagtattga gtgaaatggt catgtgtggc ggttcactat atgttaaacc aggtggaacc tcatcaggag atgccacaac tgcttatgct aatagtgttt ttaacatttg tcaagctgtc	TAATACGACTCACTATAGGGagtaattgga acaagcaaat tctatggtgg ttggcacaac atgttaaaaa ctgtttatag tgatgtagaa aaccctcacc ttatgggttg ggattatcct aaaCgtgata gagccatgcc taacatgctt agaattatgg cctcacttgt tcttgctcgc aaacatacaa cgtgttgtag cttgtcacac cgtttctata gattagctaa tgagtgtgct caagtattga gtgaaatggt catgtgtggc ggttcactat atgttaaacc aggtggaacc tcatcaggag atgccacaac tgcttatgct aatagtgttt ttaacatttg tcaagctgtc
F2-s1-34	TAATACGACTCACTATAGGG	agtaattgga acaagcaaat tctatggtgg ttggcacaac atgttaaaaa ctgtttatag tgatgtagaa aaccctcacc tta	tgggttg ggattatcct aaaGg	tgata gagccatgcc taacatgctt agaattatgg	cctcacttgt tcttgctcgc a	aacatacaa cgtgttgtag cttgtcacac cgtttctata gattagctaa tgagtgtgct caagtattga gtgaaatggt catgtgtggc ggttcactat atgttaaacc aggtggaacc tcatcaggag atgccacaac tgcttatgct aatagtgttt ttaacatttg tcaagctgtc	TAATACGACTCACTATAGGGagtaattgga acaagcaaat tctatggtgg ttggcacaac atgttaaaaa ctgtttatag tgatgtagaa aaccctcacc ttatgggttg ggattatcct aaaGgtgata gagccatgcc taacatgctt agaattatgg cctcacttgt tcttgctcgc aaacatacaa cgtgttgtag cttgtcacac cgtttctata gattagctaa tgagtgtgct caagtattga gtgaaatggt catgtgtggc ggttcactat atgttaaacc aggtggaacc tcatcaggag atgccacaac tgcttatgct aatagtgttt ttaacatttg tcaagctgtc
F2-s1-35	TAATACGACTCACTATAGGG	agtaattgga acaagcaaat tctatggtgg ttggcacaac atgttaaaaa ctgtttatag tgatgtagaa aaccctcacc tta	tgggttg ggattatcct aaatA	tgata gagccatgcc taacatgctt agaattatgg	cctcacttgt tcttgctcgc a	aacatacaa cgtgttgtag cttgtcacac cgtttctata gattagctaa tgagtgtgct caagtattga gtgaaatggt catgtgtggc ggttcactat atgttaaacc aggtggaacc tcatcaggag atgccacaac tgcttatgct aatagtgttt ttaacatttg tcaagctgtc	TAATACGACTCACTATAGGGagtaattgga acaagcaaat tctatggtgg ttggcacaac atgttaaaaa ctgtttatag tgatgtagaa aaccctcacc ttatgggttg ggattatcct aaatAtgata gagccatgcc taacatgctt agaattatgg cctcacttgt tcttgctcgc aaacatacaa cgtgttgtag cttgtcacac cgtttctata gattagctaa tgagtgtgct caagtattga gtgaaatggt catgtgtggc ggttcactat atgttaaacc aggtggaacc tcatcaggag atgccacaac tgcttatgct aatagtgttt ttaacatttg tcaagctgtc
F2-s1-36	TAATACGACTCACTATAGGG	agtaattgga acaagcaaat tctatggtgg ttggcacaac atgttaaaaa ctgtttatag tgatgtagaa aaccctcacc tta	tgggttg ggattatcct aaatT	tgata gagccatgcc taacatgctt agaattatgg	cctcacttgt tcttgctcgc a	aacatacaa cgtgttgtag cttgtcacac cgtttctata gattagctaa tgagtgtgct caagtattga gtgaaatggt catgtgtggc ggttcactat atgttaaacc aggtggaacc tcatcaggag atgccacaac tgcttatgct aatagtgttt ttaacatttg tcaagctgtc	TAATACGACTCACTATAGGGagtaattgga acaagcaaat tctatggtgg ttggcacaac atgttaaaaa ctgtttatag tgatgtagaa aaccctcacc ttatgggttg ggattatcct aaatTtgata gagccatgcc taacatgctt agaattatgg cctcacttgt tcttgctcgc aaacatacaa cgtgttgtag cttgtcacac cgtttctata gattagctaa tgagtgtgct caagtattga gtgaaatggt catgtgtggc ggttcactat atgttaaacc aggtggaacc tcatcaggag atgccacaac tgcttatgct aatagtgttt ttaacatttg tcaagctgtc
F2-s1-37	TAATACGACTCACTATAGGG	agtaattgga acaagcaaat tctatggtgg ttggcacaac atgttaaaaa ctgtttatag tgatgtagaa aaccctcacc tta	tgggttg ggattatcct aaTtg	tgata gagccatgcc taacatgctt agaattatgg	cctcacttgt tcttgctcgc a	aacatacaa cgtgttgtag cttgtcacac cgtttctata gattagctaa tgagtgtgct caagtattga gtgaaatggt catgtgtggc ggttcactat atgttaaacc aggtggaacc tcatcaggag atgccacaac tgcttatgct aatagtgttt ttaacatttg tcaagctgtc	TAATACGACTCACTATAGGGagtaattgga acaagcaaat tctatggtgg ttggcacaac atgttaaaaa ctgtttatag tgatgtagaa aaccctcacc ttatgggttg ggattatcct aaTtgtgata gagccatgcc taacatgctt agaattatgg cctcacttgt tcttgctcgc aaacatacaa cgtgttgtag cttgtcacac cgtttctata gattagctaa tgagtgtgct caagtattga gtgaaatggt catgtgtggc ggttcactat atgttaaacc aggtggaacc tcatcaggag atgccacaac tgcttatgct aatagtgttt ttaacatttg tcaagctgtc
F2-s1-38	TAATACGACTCACTATAGGG	agtaattgga acaagcaaat tctatggtgg ttggcacaac atgttaaaaa ctgtttatag tgatgtagaa aaccctcacc tta	tgggttg ggattatcct aaCtg	tgata gagccatgcc taacatgctt agaattatgg	cctcacttgt tcttgctcgc a	aacatacaa cgtgttgtag cttgtcacac cgtttctata gattagctaa tgagtgtgct caagtattga gtgaaatggt catgtgtggc ggttcactat atgttaaacc aggtggaacc tcatcaggag atgccacaac tgcttatgct aatagtgttt ttaacatttg tcaagctgtc	TAATACGACTCACTATAGGGagtaattgga acaagcaaat tctatggtgg ttggcacaac atgttaaaaa ctgtttatag tgatgtagaa aaccctcacc ttatgggttg ggattatcct aaCtgtgata gagccatgcc taacatgctt agaattatgg cctcacttgt tcttgctcgc aaacatacaa cgtgttgtag cttgtcacac cgtttctata gattagctaa tgagtgtgct caagtattga gtgaaatggt catgtgtggc ggttcactat atgttaaacc aggtggaacc tcatcaggag atgccacaac tgcttatgct aatagtgttt ttaacatttg tcaagctgtc
F2-s1-39	TAATACGACTCACTATAGGG	agtaattgga acaagcaaat tctatggtgg ttggcacaac atgttaaaaa ctgtttatag tgatgtagaa aaccctcacc tta	tgggttg ggattatcct aaGtg	tgata gagccatgcc taacatgctt agaattatgg	cctcacttgt tcttgctcgc a	aacatacaa cgtgttgtag cttgtcacac cgtttctata gattagctaa tgagtgtgct caagtattga gtgaaatggt catgtgtggc ggttcactat atgttaaacc aggtggaacc tcatcaggag atgccacaac tgcttatgct aatagtgttt ttaacatttg tcaagctgtc	TAATACGACTCACTATAGGGagtaattgga acaagcaaat tctatggtgg ttggcacaac atgttaaaaa ctgtttatag tgatgtagaa aaccctcacc ttatgggttg ggattatcct aaGtgtgata gagccatgcc taacatgctt agaattatgg cctcacttgt tcttgctcgc aaacatacaa cgtgttgtag cttgtcacac cgtttctata gattagctaa tgagtgtgct caagtattga gtgaaatggt catgtgtggc ggttcactat atgttaaacc aggtggaacc tcatcaggag atgccacaac tgcttatgct aatagtgttt ttaacatttg tcaagctgtc
LF-s1-40	TAATACGACTCACTATAGGG	agtaattgga acaagcaaat tctatggtgg ttggcacaac atgttaaaaa ctgtttatag tgatgtagaa aaccctcacc tta	tgggttg ggattatcct aaatg	tgat Tgagccatgcctaacatgct tagaattatgg	cctcacttgt tcttgctcgc a	aacatacaa cgtgttgtag cttgtcacac cgtttctata gattagctaa tgagtgtgct caagtattga gtgaaatggt catgtgtggc ggttcactat atgttaaacc aggtggaacc tcatcaggag atgccacaac tgcttatgct aatagtgttt ttaacatttg tcaagctgtc	TAATACGACTCACTATAGGGagtaattgga acaagcaaat tctatggtgg ttggcacaac atgttaaaaa ctgtttatag tgatgtagaa aaccctcacc ttatgggttg ggattatcct aaatgtgat Tgagccatgcctaacatgct tagaattatgg cctcacttgt tcttgctcgc aaacatacaa cgtgttgtag cttgtcacac cgtttctata gattagctaa tgagtgtgct caagtattga gtgaaatggt catgtgtggc ggttcactat atgttaaacc aggtggaacc tcatcaggag atgccacaac tgcttatgct aatagtgttt ttaacatttg tcaagctgtc
LF-s1-41	TAATACGACTCACTATAGGG	agtaattgga acaagcaaat tctatggtgg ttggcacaac atgttaaaaa ctgtttatag tgatgtagaa aaccctcacc tta	tgggttg ggattatcct aaatg	tgat aCagccatgcctaacatgct tagaattatgg	cctcacttgt tcttgctcgc a	aacatacaa cgtgttgtag cttgtcacac cgtttctata gattagctaa tgagtgtgct caagtattga gtgaaatggt catgtgtggc ggttcactat atgttaaacc aggtggaacc tcatcaggag atgccacaac tgcttatgct aatagtgttt ttaacatttg tcaagctgtc	TAATACGACTCACTATAGGGagtaattgga acaagcaaat tctatggtgg ttggcacaac atgttaaaaa ctgtttatag tgatgtagaa aaccctcacc ttatgggttg ggattatcct aaatgtgat aCagccatgcctaacatgct tagaattatgg cctcacttgt tcttgctcgc aaacatacaa cgtgttgtag cttgtcacac cgtttctata gattagctaa tgagtgtgct caagtattga gtgaaatggt catgtgtggc ggttcactat atgttaaacc aggtggaacc tcatcaggag atgccacaac tgcttatgct aatagtgttt ttaacatttg tcaagctgtc
LF-s1-42	TAATACGACTCACTATAGGG	agtaattgga acaagcaaat tctatggtgg ttggcacaac atgttaaaaa ctgtttatag tgatgtagaa aaccctcacc tta	tgggttg ggattatcct aaatg	tgat agTgccatgcctaacatgct tagaattatgg	cctcacttgt tcttgctcgc a	aacatacaa cgtgttgtag cttgtcacac cgtttctata gattagctaa tgagtgtgct caagtattga gtgaaatggt catgtgtggc ggttcactat atgttaaacc aggtggaacc tcatcaggag atgccacaac tgcttatgct aatagtgttt ttaacatttg tcaagctgtc	TAATACGACTCACTATAGGGagtaattgga acaagcaaat tctatggtgg ttggcacaac atgttaaaaa ctgtttatag tgatgtagaa aaccctcacc ttatgggttg ggattatcct aaatgtgat agTgccatgcctaacatgct tagaattatgg cctcacttgt tcttgctcgc aaacatacaa cgtgttgtag cttgtcacac cgtttctata gattagctaa tgagtgtgct caagtattga gtgaaatggt catgtgtggc ggttcactat atgttaaacc aggtggaacc tcatcaggag atgccacaac tgcttatgct aatagtgttt ttaacatttg tcaagctgtc
LF-s1-43	TAATACGACTCACTATAGGG	agtaattgga acaagcaaat tctatggtgg ttggcacaac atgttaaaaa ctgtttatag tgatgtagaa aaccctcacc tta	tgggttg ggattatcct aaatg	tgat agagccatCcctaacatgct tagaattatgg	cctcacttgt tcttgctcgc a	aacatacaa cgtgttgtag cttgtcacac cgtttctata gattagctaa tgagtgtgct caagtattga gtgaaatggt catgtgtggc ggttcactat atgttaaacc aggtggaacc tcatcaggag atgccacaac tgcttatgct aatagtgttt ttaacatttg tcaagctgtc	TAATACGACTCACTATAGGGagtaattgga acaagcaaat tctatggtgg ttggcacaac atgttaaaaa ctgtttatag tgatgtagaa aaccctcacc ttatgggttg ggattatcct aaatgtgat agagccatCcctaacatgct tagaattatgg cctcacttgt tcttgctcgc aaacatacaa cgtgttgtag cttgtcacac cgtttctata gattagctaa tgagtgtgct caagtattga gtgaaatggt catgtgtggc ggttcactat atgttaaacc aggtggaacc tcatcaggag atgccacaac tgcttatgct aatagtgttt ttaacatttg tcaagctgtc
LF-s1-44	TAATACGACTCACTATAGGG	agtaattgga acaagcaaat tctatggtgg ttggcacaac atgttaaaaa ctgtttatag tgatgtagaa aaccctcacc tta	tgggttg ggattatcct aaatg	tgat agagccatgcctaacaAgct tagaattatgg	cctcacttgt tcttgctcgc a	aacatacaa cgtgttgtag cttgtcacac cgtttctata gattagctaa tgagtgtgct caagtattga gtgaaatggt catgtgtggc ggttcactat atgttaaacc aggtggaacc tcatcaggag atgccacaac tgcttatgct aatagtgttt ttaacatttg tcaagctgtc	TAATACGACTCACTATAGGGagtaattgga acaagcaaat tctatggtgg ttggcacaac atgttaaaaa ctgtttatag tgatgtagaa aaccctcacc ttatgggttg ggattatcct aaatgtgat agagccatgcctaacaAgct tagaattatgg cctcacttgt tcttgctcgc aaacatacaa cgtgttgtag cttgtcacac cgtttctata gattagctaa tgagtgtgct caagtattga gtgaaatggt catgtgtggc ggttcactat atgttaaacc aggtggaacc tcatcaggag atgccacaac tgcttatgct aatagtgttt ttaacatttg tcaagctgtc
LF-s2-45	TAATACGACTCACTATAGGG	agtaattgga acaagcaaat tctatggtgg ttggcacaac atgttaaaaa ctgtttatag tgatgtagaa aaccctcacc tta	tgggttg ggattatcct aaatg	tgat TCagccatgcctaacatgct tagaattatgg	cctcacttgt tcttgctcgc a	aacatacaa cgtgttgtag cttgtcacac cgtttctata gattagctaa tgagtgtgct caagtattga gtgaaatggt catgtgtggc ggttcactat atgttaaacc aggtggaacc tcatcaggag atgccacaac tgcttatgct aatagtgttt ttaacatttg tcaagctgtc	TAATACGACTCACTATAGGGagtaattgga acaagcaaat tctatggtgg ttggcacaac atgttaaaaa ctgtttatag tgatgtagaa aaccctcacc ttatgggttg ggattatcct aaatgtgat TCagccatgcctaacatgct tagaattatgg cctcacttgt tcttgctcgc aaacatacaa cgtgttgtag cttgtcacac cgtttctata gattagctaa tgagtgtgct caagtattga gtgaaatggt catgtgtggc ggttcactat atgttaaacc aggtggaacc tcatcaggag atgccacaac tgcttatgct aatagtgttt ttaacatttg tcaagctgtc
LF-s2-46	TAATACGACTCACTATAGGG	agtaattgga acaagcaaat tctatggtgg ttggcacaac atgttaaaaa ctgtttatag tgatgtagaa aaccctcacc tta	tgggttg ggattatcct aaatg	tgat aCTgccatgcctaacatgct tagaattatgg	cctcacttgt tcttgctcgc a	aacatacaa cgtgttgtag cttgtcacac cgtttctata gattagctaa tgagtgtgct caagtattga gtgaaatggt catgtgtggc ggttcactat atgttaaacc aggtggaacc tcatcaggag atgccacaac tgcttatgct aatagtgttt ttaacatttg tcaagctgtc	TAATACGACTCACTATAGGGagtaattgga acaagcaaat tctatggtgg ttggcacaac atgttaaaaa ctgtttatag tgatgtagaa aaccctcacc ttatgggttg ggattatcct aaatgtgat aCTgccatgcctaacatgct tagaattatgg cctcacttgt tcttgctcgc aaacatacaa cgtgttgtag cttgtcacac cgtttctata gattagctaa tgagtgtgct caagtattga gtgaaatggt catgtgtggc ggttcactat atgttaaacc aggtggaacc tcatcaggag atgccacaac tgcttatgct aatagtgttt ttaacatttg tcaagctgtc
LF-s2-47	TAATACGACTCACTATAGGG	agtaattgga acaagcaaat tctatggtgg ttggcacaac atgttaaaaa ctgtttatag tgatgtagaa aaccctcacc tta	tgggttg ggattatcct aaatg	tgat agagccatCcctaacaAgct tagaattatgg	cctcacttgt tcttgctcgc a	aacatacaa cgtgttgtag cttgtcacac cgtttctata gattagctaa tgagtgtgct caagtattga gtgaaatggt catgtgtggc ggttcactat atgttaaacc aggtggaacc tcatcaggag atgccacaac tgcttatgct aatagtgttt ttaacatttg tcaagctgtc	TAATACGACTCACTATAGGGagtaattgga acaagcaaat tctatggtgg ttggcacaac atgttaaaaa ctgtttatag tgatgtagaa aaccctcacc ttatgggttg ggattatcct aaatgtgat agagccatCcctaacaAgct tagaattatgg cctcacttgt tcttgctcgc aaacatacaa cgtgttgtag cttgtcacac cgtttctata gattagctaa tgagtgtgct caagtattga gtgaaatggt catgtgtggc ggttcactat atgttaaacc aggtggaacc tcatcaggag atgccacaac tgcttatgct aatagtgttt ttaacatttg tcaagctgtc
F3-s1-48	TAATACGACTCACTATAGGG	agtaattggaacaagcaaattc tatggtggttggcacaaG atgttaaaaactgtttatagtgatgtagaaaaccctcacctta	tgggttg ggattatcct aaatg	tgata gagccatgcc taacatgctt agaattatgg	cctcacttgt tcttgctcgc a	aacatacaa cgtgttgtag cttgtcacac cgtttctata gattagctaa tgagtgtgct caagtattga gtgaaatggt catgtgtggc ggttcactat atgttaaacc aggtggaacc tcatcaggag atgccacaac tgcttatgct aatagtgttt ttaacatttg tcaagctgtc	TAATACGACTCACTATAGGGagtaattggaacaagcaaattc tatggtggttggcacaaG atgttaaaaactgtttatagtgatgtagaaaaccctcaccttatgggttg ggattatcct aaatgtgata gagccatgcc taacatgctt agaattatgg cctcacttgt tcttgctcgc aaacatacaa cgtgttgtag cttgtcacac cgtttctata gattagctaa tgagtgtgct caagtattga gtgaaatggt catgtgtggc ggttcactat atgttaaacc aggtggaacc tcatcaggag atgccacaac tgcttatgct aatagtgttt ttaacatttg tcaagctgtc
F3-s1-49	TAATACGACTCACTATAGGG	agtaattggaacaagcaaattc tatggtggttggcacaTc atgttaaaaactgtttatagtgatgtagaaaaccctcacctta	tgggttg ggattatcct aaatg	tgata gagccatgcc taacatgctt agaattatgg	cctcacttgt tcttgctcgc a	aacatacaa cgtgttgtag cttgtcacac cgtttctata gattagctaa tgagtgtgct caagtattga gtgaaatggt catgtgtggc ggttcactat atgttaaacc aggtggaacc tcatcaggag atgccacaac tgcttatgct aatagtgttt ttaacatttg tcaagctgtc	TAATACGACTCACTATAGGGagtaattggaacaagcaaattc tatggtggttggcacaTc atgttaaaaactgtttatagtgatgtagaaaaccctcaccttatgggttg ggattatcct aaatgtgata gagccatgcc taacatgctt agaattatgg cctcacttgt tcttgctcgc aaacatacaa cgtgttgtag cttgtcacac cgtttctata gattagctaa tgagtgtgct caagtattga gtgaaatggt catgtgtggc ggttcactat atgttaaacc aggtggaacc tcatcaggag atgccacaac tgcttatgct aatagtgttt ttaacatttg tcaagctgtc
F3-s1-50	TAATACGACTCACTATAGGG	agtaattggaacaagcaaattc tatggtggtAggcacaac atgttaaaaactgtttatagtgatgtagaaaaccctcacctta	tgggttg ggattatcct aaatg	tgata gagccatgcc taacatgctt agaattatgg	cctcacttgt tcttgctcgc a	aacatacaa cgtgttgtag cttgtcacac cgtttctata gattagctaa tgagtgtgct caagtattga gtgaaatggt catgtgtggc ggttcactat atgttaaacc aggtggaacc tcatcaggag atgccacaac tgcttatgct aatagtgttt ttaacatttg tcaagctgtc	TAATACGACTCACTATAGGGagtaattggaacaagcaaattc tatggtggtAggcacaac atgttaaaaactgtttatagtgatgtagaaaaccctcaccttatgggttg ggattatcct aaatgtgata gagccatgcc taacatgctt agaattatgg cctcacttgt tcttgctcgc aaacatacaa cgtgttgtag cttgtcacac cgtttctata gattagctaa tgagtgtgct caagtattga gtgaaatggt catgtgtggc ggttcactat atgttaaacc aggtggaacc tcatcaggag atgccacaac tgcttatgct aatagtgttt ttaacatttg tcaagctgtc
F3-s2-51	TAATACGACTCACTATAGGG	agtaattggaacaagcaaattc tatggtggttggcacaTG atgttaaaaactgtttatagtgatgtagaaaaccctcacctta	tgggttg ggattatcct aaatg	tgata gagccatgcc taacatgctt agaattatgg	cctcacttgt tcttgctcgc a	aacatacaa cgtgttgtag cttgtcacac cgtttctata gattagctaa tgagtgtgct caagtattga gtgaaatggt catgtgtggc ggttcactat atgttaaacc aggtggaacc tcatcaggag atgccacaac tgcttatgct aatagtgttt ttaacatttg tcaagctgtc	TAATACGACTCACTATAGGGagtaattggaacaagcaaattc tatggtggttggcacaTG atgttaaaaactgtttatagtgatgtagaaaaccctcaccttatgggttg ggattatcct aaatgtgata gagccatgcc taacatgctt agaattatgg cctcacttgt tcttgctcgc aaacatacaa cgtgttgtag cttgtcacac cgtttctata gattagctaa tgagtgtgct caagtattga gtgaaatggt catgtgtggc ggttcactat atgttaaacc aggtggaacc tcatcaggag atgccacaac tgcttatgct aatagtgttt ttaacatttg tcaagctgtc
F3-s2-52	TAATACGACTCACTATAGGG	agtaattggaacaagcaaattc tatggtggtAggcacaaG atgttaaaaactgtttatagtgatgtagaaaaccctcacctta	tgggttg ggattatcct aaatg	tgata gagccatgcc taacatgctt agaattatgg	cctcacttgt tcttgctcgc a	aacatacaa cgtgttgtag cttgtcacac cgtttctata gattagctaa tgagtgtgct caagtattga gtgaaatggt catgtgtggc ggttcactat atgttaaacc aggtggaacc tcatcaggag atgccacaac tgcttatgct aatagtgttt ttaacatttg tcaagctgtc	TAATACGACTCACTATAGGGagtaattggaacaagcaaattc tatggtggtAggcacaaG atgttaaaaactgtttatagtgatgtagaaaaccctcaccttatgggttg ggattatcct aaatgtgata gagccatgcc taacatgctt agaattatgg cctcacttgt tcttgctcgc aaacatacaa cgtgttgtag cttgtcacac cgtttctata gattagctaa tgagtgtgct caagtattga gtgaaatggt catgtgtggc ggttcactat atgttaaacc aggtggaacc tcatcaggag atgccacaac tgcttatgct aatagtgttt ttaacatttg tcaagctgtc
F3-s3-53	TAATACGACTCACTATAGGG	agtaattggaacaagcaaattc tatggtggttggcacTTG atgttaaaaactgtttatagtgatgtagaaaaccctcacctta	tgggttg ggattatcct aaatg	tgata gagccatgcc taacatgctt agaattatgg	cctcacttgt tcttgctcgc a	aacatacaa cgtgttgtag cttgtcacac cgtttctata gattagctaa tgagtgtgct caagtattga gtgaaatggt catgtgtggc ggttcactat atgttaaacc aggtggaacc tcatcaggag atgccacaac tgcttatgct aatagtgttt ttaacatttg tcaagctgtc	TAATACGACTCACTATAGGGagtaattggaacaagcaaattc tatggtggttggcacTTG atgttaaaaactgtttatagtgatgtagaaaaccctcaccttatgggttg ggattatcct aaatgtgata gagccatgcc taacatgctt agaattatgg cctcacttgt tcttgctcgc aaacatacaa cgtgttgtag cttgtcacac cgtttctata gattagctaa tgagtgtgct caagtattga gtgaaatggt catgtgtggc ggttcactat atgttaaacc aggtggaacc tcatcaggag atgccacaac tgcttatgct aatagtgttt ttaacatttg tcaagctgtc
F3-s3-54	TAATACGACTCACTATAGGG	agtaattggaacaagcaaattc tatggtggtAggcacaTG atgttaaaaactgtttatagtgatgtagaaaaccctcacctta	tgggttg ggattatcct aaatg	tgata gagccatgcc taacatgctt agaattatgg	cctcacttgt tcttgctcgc a	aacatacaa cgtgttgtag cttgtcacac cgtttctata gattagctaa tgagtgtgct caagtattga gtgaaatggt catgtgtggc ggttcactat atgttaaacc aggtggaacc tcatcaggag atgccacaac tgcttatgct aatagtgttt ttaacatttg tcaagctgtc	TAATACGACTCACTATAGGGagtaattggaacaagcaaattc tatggtggtAggcacaTG atgttaaaaactgtttatagtgatgtagaaaaccctcaccttatgggttg ggattatcct aaatgtgata gagccatgcc taacatgctt agaattatgg cctcacttgt tcttgctcgc aaacatacaa cgtgttgtag cttgtcacac cgtttctata gattagctaa tgagtgtgct caagtattga gtgaaatggt catgtgtggc ggttcactat atgttaaacc aggtggaacc tcatcaggag atgccacaac tgcttatgct aatagtgttt ttaacatttg tcaagctgtc
B2-s1-55	TAATACGACTCACTATAGGG	agtaattgga acaagcaaat tctatggtgg ttggcacaac atgttaaaaa ctgtttatag tgatgtagaa aaccctcacc tta	tgggttg ggattatcct aaatg	tgata gagccatgcc taacatgctt agaattatgg	cctcacttgt tcttgctcgc a	aacatacaacgtgttgtagcttgtcacaccgtttctatagattagctaatgagtgtgctcaagtattg Tgtgaaatggtcatgtgtgg cggttcactatatgttaaaccaggtggaacctcatcaggagatgccacaactgcttatgctaatagtgtttttaacatttgtcaagctgtc	TAATACGACTCACTATAGGGagtaattgga acaagcaaat tctatggtgg ttggcacaac atgttaaaaa ctgtttatag tgatgtagaa aaccctcacc ttatgggttg ggattatcct aaatgtgata gagccatgcc taacatgctt agaattatgg cctcacttgt tcttgctcgc aaacatacaacgtgttgtagcttgtcacaccgtttctatagattagctaatgagtgtgctcaagtattg Tgtgaaatggtcatgtgtgg cggttcactatatgttaaaccaggtggaacctcatcaggagatgccacaactgcttatgctaatagtgtttttaacatttgtcaagctgtc
B2-s1-56	TAATACGACTCACTATAGGG	agtaattgga acaagcaaat tctatggtgg ttggcacaac atgttaaaaa ctgtttatag tgatgtagaa aaccctcacc tta	tgggttg ggattatcct aaatg	tgata gagccatgcc taacatgctt agaattatgg	cctcacttgt tcttgctcgc a	aacatacaacgtgttgtagcttgtcacaccgtttctatagattagctaatgagtgtgctcaagtattg aCtgaaatggtcatgtgtgg cggttcactatatgttaaaccaggtggaacctcatcaggagatgccacaactgcttatgctaatagtgtttttaacatttgtcaagctgtc	TAATACGACTCACTATAGGGagtaattgga acaagcaaat tctatggtgg ttggcacaac atgttaaaaa ctgtttatag tgatgtagaa aaccctcacc ttatgggttg ggattatcct aaatgtgata gagccatgcc taacatgctt agaattatgg cctcacttgt tcttgctcgc aaacatacaacgtgttgtagcttgtcacaccgtttctatagattagctaatgagtgtgctcaagtattg aCtgaaatggtcatgtgtgg cggttcactatatgttaaaccaggtggaacctcatcaggagatgccacaactgcttatgctaatagtgtttttaacatttgtcaagctgtc
B2-s1-57	TAATACGACTCACTATAGGG	agtaattgga acaagcaaat tctatggtgg ttggcacaac atgttaaaaa ctgtttatag tgatgtagaa aaccctcacc tta	tgggttg ggattatcct aaatg	tgata gagccatgcc taacatgctt agaattatgg	cctcacttgt tcttgctcgc a	aacatacaacgtgttgtagcttgtcacaccgtttctatagattagctaatgagtgtgctcaagtattg agAgaaatggtcatgtgtgg cggttcactatatgttaaaccaggtggaacctcatcaggagatgccacaactgcttatgctaatagtgtttttaacatttgtcaagctgtc	TAATACGACTCACTATAGGGagtaattgga acaagcaaat tctatggtgg ttggcacaac atgttaaaaa ctgtttatag tgatgtagaa aaccctcacc ttatgggttg ggattatcct aaatgtgata gagccatgcc taacatgctt agaattatgg cctcacttgt tcttgctcgc aaacatacaacgtgttgtagcttgtcacaccgtttctatagattagctaatgagtgtgctcaagtattg agAgaaatggtcatgtgtgg cggttcactatatgttaaaccaggtggaacctcatcaggagatgccacaactgcttatgctaatagtgtttttaacatttgtcaagctgtc
B2-s1-58	TAATACGACTCACTATAGGG	agtaattgga acaagcaaat tctatggtgg ttggcacaac atgttaaaaa ctgtttatag tgatgtagaa aaccctcacc tta	tgggttg ggattatcct aaatg	tgata gagccatgcc taacatgctt agaattatgg	cctcacttgt tcttgctcgc a	aacatacaacgtgttgtagcttgtcacaccgtttctatagattagctaatgagtgtgctcaagtattg agtgaaatgCtcatgtgtgg cggttcactatatgttaaaccaggtggaacctcatcaggagatgccacaactgcttatgctaatagtgtttttaacatttgtcaagctgtc	TAATACGACTCACTATAGGGagtaattgga acaagcaaat tctatggtgg ttggcacaac atgttaaaaa ctgtttatag tgatgtagaa aaccctcacc ttatgggttg ggattatcct aaatgtgata gagccatgcc taacatgctt agaattatgg cctcacttgt tcttgctcgc aaacatacaacgtgttgtagcttgtcacaccgtttctatagattagctaatgagtgtgctcaagtattg agtgaaatgCtcatgtgtgg cggttcactatatgttaaaccaggtggaacctcatcaggagatgccacaactgcttatgctaatagtgtttttaacatttgtcaagctgtc
B2-s2-59	TAATACGACTCACTATAGGG	agtaattgga acaagcaaat tctatggtgg ttggcacaac atgttaaaaa ctgtttatag tgatgtagaa aaccctcacc tta	tgggttg ggattatcct aaatg	tgata gagccatgcc taacatgctt agaattatgg	cctcacttgt tcttgctcgc a	aacatacaacgtgttgtagcttgtcacaccgtttctatagattagctaatgagtgtgctcaagtattg TgAgaaatggtcatgtgtgg cggttcactatatgttaaaccaggtggaacctcatcaggagatgccacaactgcttatgctaatagtgtttttaacatttgtcaagctgtc	TAATACGACTCACTATAGGGagtaattgga acaagcaaat tctatggtgg ttggcacaac atgttaaaaa ctgtttatag tgatgtagaa aaccctcacc ttatgggttg ggattatcct aaatgtgata gagccatgcc taacatgctt agaattatgg cctcacttgt tcttgctcgc aaacatacaacgtgttgtagcttgtcacaccgtttctatagattagctaatgagtgtgctcaagtattg TgAgaaatggtcatgtgtgg cggttcactatatgttaaaccaggtggaacctcatcaggagatgccacaactgcttatgctaatagtgtttttaacatttgtcaagctgtc
B2-s2-60	TAATACGACTCACTATAGGG	agtaattgga acaagcaaat tctatggtgg ttggcacaac atgttaaaaa ctgtttatag tgatgtagaa aaccctcacc tta	tgggttg ggattatcct aaatg	tgata gagccatgcc taacatgctt agaattatgg	cctcacttgt tcttgctcgc a	aacatacaacgtgttgtagcttgtcacaccgtttctatagattagctaatgagtgtgctcaagtattg agAgaaatgCtcatgtgtgg cggttcactatatgttaaaccaggtggaacctcatcaggagatgccacaactgcttatgctaatagtgtttttaacatttgtcaagctgtc	TAATACGACTCACTATAGGGagtaattgga acaagcaaat tctatggtgg ttggcacaac atgttaaaaa ctgtttatag tgatgtagaa aaccctcacc ttatgggttg ggattatcct aaatgtgata gagccatgcc taacatgctt agaattatgg cctcacttgt tcttgctcgc aaacatacaacgtgttgtagcttgtcacaccgtttctatagattagctaatgagtgtgctcaagtattg agAgaaatgCtcatgtgtgg cggttcactatatgttaaaccaggtggaacctcatcaggagatgccacaactgcttatgctaatagtgtttttaacatttgtcaagctgtc
B1-s1-61	TAATACGACTCACTATAGGG	agtaattgga acaagcaaat tctatggtgg ttggcacaac atgttaaaaa ctgtttatag tgatgtagaa aaccctcacc tta	tgggttg ggattatcct aaatg	tgata gagccatgcc taacatgctt agaattatgg	cctcacttgt tcttgctcgc a	aacatacaacg Agttgtagcttgtcacaccgtt tctatagattagctaatgagtgtgctcaagtattgagtgaaatggtcatgtgtggcggttcactatatgttaaaccaggtggaacctcatcaggagatgccacaactgcttatgctaatagtgtttttaacatttgtcaagctgtc	TAATACGACTCACTATAGGGagtaattgga acaagcaaat tctatggtgg ttggcacaac atgttaaaaa ctgtttatag tgatgtagaa aaccctcacc ttatgggttg ggattatcct aaatgtgata gagccatgcc taacatgctt agaattatgg cctcacttgt tcttgctcgc aaacatacaacg Agttgtagcttgtcacaccgtt tctatagattagctaatgagtgtgctcaagtattgagtgaaatggtcatgtgtggcggttcactatatgttaaaccaggtggaacctcatcaggagatgccacaactgcttatgctaatagtgtttttaacatttgtcaagctgtc
B1-s1-62	TAATACGACTCACTATAGGG	agtaattgga acaagcaaat tctatggtgg ttggcacaac atgttaaaaa ctgtttatag tgatgtagaa aaccctcacc tta	tgggttg ggattatcct aaatg	tgata gagccatgcc taacatgctt agaattatgg	cctcacttgt tcttgctcgc a	aacatacaacg tgAtgtagcttgtcacaccgtt tctatagattagctaatgagtgtgctcaagtattgagtgaaatggtcatgtgtggcggttcactatatgttaaaccaggtggaacctcatcaggagatgccacaactgcttatgctaatagtgtttttaacatttgtcaagctgtc	TAATACGACTCACTATAGGGagtaattgga acaagcaaat tctatggtgg ttggcacaac atgttaaaaa ctgtttatag tgatgtagaa aaccctcacc ttatgggttg ggattatcct aaatgtgata gagccatgcc taacatgctt agaattatgg cctcacttgt tcttgctcgc aaacatacaacg tgAtgtagcttgtcacaccgtt tctatagattagctaatgagtgtgctcaagtattgagtgaaatggtcatgtgtggcggttcactatatgttaaaccaggtggaacctcatcaggagatgccacaactgcttatgctaatagtgtttttaacatttgtcaagctgtc
B1-s2-63	TAATACGACTCACTATAGGG	agtaattgga acaagcaaat tctatggtgg ttggcacaac atgttaaaaa ctgtttatag tgatgtagaa aaccctcacc tta	tgggttg ggattatcct aaatg	tgata gagccatgcc taacatgctt agaattatgg	cctcacttgt tcttgctcgc a	aacatacaacg AgAtgtagcttgtcacaccgtt tctatagattagctaatgagtgtgctcaagtattgagtgaaatggtcatgtgtggcggttcactatatgttaaaccaggtggaacctcatcaggagatgccacaactgcttatgctaatagtgtttttaacatttgtcaagctgtc	TAATACGACTCACTATAGGGagtaattgga acaagcaaat tctatggtgg ttggcacaac atgttaaaaa ctgtttatag tgatgtagaa aaccctcacc ttatgggttg ggattatcct aaatgtgata gagccatgcc taacatgctt agaattatgg cctcacttgt tcttgctcgc aaacatacaacg AgAtgtagcttgtcacaccgtt tctatagattagctaatgagtgtgctcaagtattgagtgaaatggtcatgtgtggcggttcactatatgttaaaccaggtggaacctcatcaggagatgccacaactgcttatgctaatagtgtttttaacatttgtcaagctgtc
B1-s2-64	TAATACGACTCACTATAGGG	agtaattgga acaagcaaat tctatggtgg ttggcacaac atgttaaaaa ctgtttatag tgatgtagaa aaccctcacc tta	tgggttg ggattatcct aaatg	tgata gagccatgcc taacatgctt agaattatgg	cctcacttgt tcttgctcgc a	aacatacaacg tgttgtagcttgtcaGaccgtA tctatagattagctaatgagtgtgctcaagtattgagtgaaatggtcatgtgtggcggttcactatatgttaaaccaggtggaacctcatcaggagatgccacaactgcttatgctaatagtgtttttaacatttgtcaagctgtc	TAATACGACTCACTATAGGGagtaattgga acaagcaaat tctatggtgg ttggcacaac atgttaaaaa ctgtttatag tgatgtagaa aaccctcacc ttatgggttg ggattatcct aaatgtgata gagccatgcc taacatgctt agaattatgg cctcacttgt tcttgctcgc aaacatacaacg tgttgtagcttgtcaGaccgtA tctatagattagctaatgagtgtgctcaagtattgagtgaaatggtcatgtgtggcggttcactatatgttaaaccaggtggaacctcatcaggagatgccacaactgcttatgctaatagtgtttttaacatttgtcaagctgtc
B3-s1-65	TAATACGACTCACTATAGGG	agtaattgga acaagcaaat tctatggtgg ttggcacaac atgttaaaaa ctgtttatag tgatgtagaa aaccctcacc tta	tgggttg ggattatcct aaatg	tgata gagccatgcc taacatgctt agaattatgg	cctcacttgt tcttgctcgc a	aacatacaacgtgttgtagcttgtcacaccgtttctatagattagctaatgagtgtgctcaagtattgagtgaaatggtcatgtgtggcggttcactatatgttaaaccaggtggaacctcatcaggagatg ccTcaactgcttatgctaatag tgtttttaacatttgtcaagctgtc	TAATACGACTCACTATAGGGagtaattgga acaagcaaat tctatggtgg ttggcacaac atgttaaaaa ctgtttatag tgatgtagaa aaccctcacc ttatgggttg ggattatcct aaatgtgata gagccatgcc taacatgctt agaattatgg cctcacttgt tcttgctcgc aaacatacaacgtgttgtagcttgtcacaccgtttctatagattagctaatgagtgtgctcaagtattgagtgaaatggtcatgtgtggcggttcactatatgttaaaccaggtggaacctcatcaggagatg ccTcaactgcttatgctaatag tgtttttaacatttgtcaagctgtc
B3-s2-66	TAATACGACTCACTATAGGG	agtaattgga acaagcaaat tctatggtgg ttggcacaac atgttaaaaa ctgtttatag tgatgtagaa aaccctcacc tta	tgggttg ggattatcct aaatg	tgata gagccatgcc taacatgctt agaattatgg	cctcacttgt tcttgctcgc a	aacatacaacgtgttgtagcttgtcacaccgtttctatagattagctaatgagtgtgctcaagtattgagtgaaatggtcatgtgtggcggttcactatatgttaaaccaggtggaacctcatcaggagatg cGTcaactgcttatgctaatag tgtttttaacatttgtcaagctgtc	TAATACGACTCACTATAGGGagtaattgga acaagcaaat tctatggtgg ttggcacaac atgttaaaaa ctgtttatag tgatgtagaa aaccctcacc ttatgggttg ggattatcct aaatgtgata gagccatgcc taacatgctt agaattatgg cctcacttgt tcttgctcgc aaacatacaacgtgttgtagcttgtcacaccgtttctatagattagctaatgagtgtgctcaagtattgagtgaaatggtcatgtgtggcggttcactatatgttaaaccaggtggaacctcatcaggagatg cGTcaactgcttatgctaatag tgtttttaacatttgtcaagctgtc
B3-s3-67	TAATACGACTCACTATAGGG	agtaattgga acaagcaaat tctatggtgg ttggcacaac atgttaaaaa ctgtttatag tgatgtagaa aaccctcacc tta	tgggttg ggattatcct aaatg	tgata gagccatgcc taacatgctt agaattatgg	cctcacttgt tcttgctcgc a	aacatacaacgtgttgtagcttgtcacaccgtttctatagattagctaatgagtgtgctcaagtattgagtgaaatggtcatgtgtggcggttcactatatgttaaaccaggtggaacctcatcaggagatg GGTcaactgcttatgctaatag tgtttttaacatttgtcaagctgtc	TAATACGACTCACTATAGGGagtaattgga acaagcaaat tctatggtgg ttggcacaac atgttaaaaa ctgtttatag tgatgtagaa aaccctcacc ttatgggttg ggattatcct aaatgtgata gagccatgcc taacatgctt agaattatgg cctcacttgt tcttgctcgc aaacatacaacgtgttgtagcttgtcacaccgtttctatagattagctaatgagtgtgctcaagtattgagtgaaatggtcatgtgtggcggttcactatatgttaaaccaggtggaacctcatcaggagatg GGTcaactgcttatgctaatag tgtttttaacatttgtcaagctgtc
F2-B2-s2-68	TAATACGACTCACTATAGGG	agtaattgga acaagcaaat tctatggtgg ttggcacaac atgttaaaaa ctgtttatag tgatgtagaa aaccctcacc tta	tgggttg ggattatcct aaaAg	tgata gagccatgcc taacatgctt agaattatgg	cctcacttgt tcttgctcgc a	aacatacaacgtgttgtagcttgtcacaccgtttctatagattagctaatgagtgtgctcaagtattg aCtgaaatggtcatgtgtgg cggttcactatatgttaaaccaggtggaacctcatcaggagatgccacaactgcttatgctaatagtgtttttaacatttgtcaagctgtc	TAATACGACTCACTATAGGGagtaattgga acaagcaaat tctatggtgg ttggcacaac atgttaaaaa ctgtttatag tgatgtagaa aaccctcacc ttatgggttg ggattatcct aaaAgtgata gagccatgcc taacatgctt agaattatgg cctcacttgt tcttgctcgc aaacatacaacgtgttgtagcttgtcacaccgtttctatagattagctaatgagtgtgctcaagtattg aCtgaaatggtcatgtgtgg cggttcactatatgttaaaccaggtggaacctcatcaggagatgccacaactgcttatgctaatagtgtttttaacatttgtcaagctgtc
F1-B1-s2-69	TAATACGACTCACTATAGGG	agtaattgga acaagcaaat tctatggtgg ttggcacaac atgttaaaaa ctgtttatag tgatgtagaa aaccctcacc tta	tgggttg ggattatcct aaatg	tgata gagccatgcc taacatgctt agaattatgg	cctcacttgt tcttgctGgc a	aacatacaacg tgAtgtagcttgtcacaccgtt tctatagattagctaatgagtgtgctcaagtattgagtgaaatggtcatgtgtggcggttcactatatgttaaaccaggtggaacctcatcaggagatgccacaactgcttatgctaatagtgtttttaacatttgtcaagctgtc	TAATACGACTCACTATAGGGagtaattgga acaagcaaat tctatggtgg ttggcacaac atgttaaaaa ctgtttatag tgatgtagaa aaccctcacc ttatgggttg ggattatcct aaatgtgata gagccatgcc taacatgctt agaattatgg cctcacttgt tcttgctGgc aaacatacaacg tgAtgtagcttgtcacaccgtt tctatagattagctaatgagtgtgctcaagtattgagtgaaatggtcatgtgtggcggttcactatatgttaaaccaggtggaacctcatcaggagatgccacaactgcttatgctaatagtgtttttaacatttgtcaagctgtc

## Sheet: Table S3
Sample Name	Positivity Rate (%)
Positive Control	98.8
F2-s1-1	12.5
F2-s1-2	60.4
F2-s1-3	82.5
F2-s1-4	72.9
F2-s2-5	28.1
F2-s2-6	56.3
F2-s2-7	52.5
F2-s2-8	12.5
F2-s2-9	46.9
F2-s2-10	25
F2-s3-11	30
F1-s1-12	58.3
F1-s1-13	33.3
F1-s1-14	100
F1-s1-15	91.7
F1-s2-16	4.2
F1-s2-17	90.6
F1-s2-18	12.5
F1-s2-19	100
F1-s2-20	100
F1-s2-21	47.5
F1-s3-22	0
F1-F2-s3-23	65
F1-F2-s3-24	64.6
F1-F2-s4-25	56.3
F1-F2-s4-26	16.7
BTWN-s2-27	100
BTWN-s3-28	95.8
BTWN-s4-29	95.8
F2-d3-30	100
F1-d3-31	91.7
F2-s1-32	32.5
F2-s1-33	56.3
F2-s1-34	18.8
F2-s1-35	27.5
F2-s1-36	6.3
F2-s1-37	45.8
F2-s1-38	50
F2-s1-39	28.1
LF-s1-40	100
LF-s1-41	100
LF-s1-42	100
LF-s1-43	100
LF-s1-44	100
LF-s2-45	100
LF-s2-46	96.9
LF-s2-47	96.9
F3-s1-48	100
F3-s1-49	95.8
F3-s1-50	100
F3-s2-51	87.5
F3-s2-52	78.1
F3-s3-53	54.2
F3-s3-54	46.9
B2-s1-55	12.5
B2-s1-56	29.2
B2-s1-57	75
B2-s1-58	28.1
B2-s2-59	0
B2-s2-60	8.3
B1-s1-61	62.5
B1-s1-62	100
B1-s2-63	0
B1-s2-64	58.3
B3-s1-65	91.7
B3-s2-66	91.7
B3-s3-67	95.8
F2-B2-s2-68	8.3
F1-B1-s2-69	41.7

## Sheet: Table S4
Na = 50mM; Mg = 8mM; dNTP = 5mM; Oligo = 0.25uM
Sample Name	Exact Match Tm (°C)	% Bound Exact Match	Mismatch Tm (°C)	% Bound Mismatch
F2-s1-1	61	50	61.3	55.8
F2-s1-2	61	50	57.8	11.2
F2-s1-3	61	50	57.6	9.4
F2-s1-4	61	50	58.3	13.3
F1-s1-12	65.7	50	65.2	42
F1-s1-13	65.7	50	61.9	7.9
F1-s1-14	65.7	50	62.6	11.8
F1-s1-15	65.7	50	60.7	3.4
F2-s1-32	61	50	56.3	3.5
F2-s1-33	61	50	58.7	16.6
F2-s1-34	61	50	55.6	2.4
F2-s1-35	61	50	61.1	52.2
F2-s1-36	61	50	61.1	52.2
F2-s1-37	61	50	57.3	8
F2-s1-38	61	50	59.5	26.4
F2-s1-39	61	50	57.7	10.6
LF-s1-40	64.9	50	64.6	46
LF-s1-41	64.9	50	57.7	1.5
LF-s1-42	64.9	50	59.8	3.8
LF-s1-43	64.9	50	57.5	1.6
LF-s1-44	64.9	50	60.2	5.7
F3-s1-48	60.9	50	58.2	16.7
F3-s1-49	60.9	50	55.5	4.4
F3-s1-50	60.9	50	55.5	4.1
B2-s1-55	61.4	50	61.1	45.6
B2-s1-56	61.4	50	51.5	0.2
B2-s1-57	61.4	50	55.7	2.7
B2-s1-58	61.4	50	52.1	0.3
B1-s1-61	65.4	50	65	41.6
B1-s1-62	65.4	50	60.2	2.3
B3-s1-65	60	50	55	2.6
